# Supplementary material for: Early language exposure affects neural mechanisms of semantic representations
Source: eLife. 2023 May 10;12:e81681. doi: 10.7554/eLife.81681 (PMC10238089; doi:10.7554/eLife.81681)
Supplement: Figure 1—source data 2. [file elife-81681-fig1-data2.xlsx]

## Sheet: Figure1a
sub_id	Fisher-zR between individual RDM and benchmark RDM
Native01	0.579912
Native02	0.554436
Native03	0.434191
Native04	0.544577
Native05	0.261571
Native06	0.190924
Native07	0.421319
Native08	0.226735
Native09	0.27898
Native10	0.519135
Native11	0.375795
Native12	0.231996
Native13	0.0731431
Native14	0.236786
Native15	0.303398
Native16	0.400212
Delayed01	0.291662
Delayed02	0.560888
Delayed03	0.171271
Delayed04	0.360783
Delayed05	0.593956
Delayed06	0.234292
Delayed07	0.36265
Delayed08	0.51374
Delayed09	0.246817
Delayed10	0.477806
Delayed11	0.541688
Delayed12	0.310088
Delayed13	0.194322
Delayed14	--
Delayed15	0.511381
Delayed16	0.380543
Delayed17	--
Delayed18	0.236307
Delayed19	0.486609
Delayed20	0.165885
Delayed21	0.218381
Delayed22	0.461944
Delayed23	0.449287
