# Supplementary material for: Early language exposure affects neural mechanisms of semantic representations
Source: eLife. 2023 May 10;12:e81681. doi: 10.7554/eLife.81681 (PMC10238089; doi:10.7554/eLife.81681)
Supplement: Figure 2—source data 1. [file elife-81681-fig2-data1.xlsx]

## Sheet: Figure2b
sub_id	ldATL	pMTG	IFG
Native01	0.0140888	0.0350308	0.0120653
Native02	0.0183811	0.0154568	0.0145348
Native03	0.0104324	0.0219723	0.0113277
Native04	0.0242486	0.0115156	0.028131
Native05	0.0255735	0.00373957	0.00884354
Native06	0.0345665	0.0158874	0.0186175
Native07	0.0136381	0.0191195	0.0146476
Native08	0.0209201	-0.00718376	-0.00423083
Native09	0.0195625	0.0193411	0.0128376
Native10	0.0202244	0.0213433	-0.0185733
Native11	0.00860402	0.00385411	0.0154795
Native12	0.0204129	-0.0062502	0.00504379
Native13	0.00429196	0.0289745	0.00359975
Native14	0.0264544	0.0419357	0.0539028
Native15	-0.0062927	-0.00962797	0.000500577
Native16	0.0289152	-0.00927719	0.0106634
Delayed01	-0.0065221	0.0410134	-0.00562414
Delayed02	-0.0166294	-0.00637333	-0.0195728
Delayed03	0.0199595	0.039503	0.0164934
Delayed04	0.00161357	-0.000986011	-0.00465833
Delayed05	0.00483411	0.00785401	0.0125027
Delayed06	0.0142669	0.00731913	-0.00939169
Delayed07	-0.00527215	0.0176996	0.00922705
Delayed08	-0.00709438	-0.00820051	-0.00257498
Delayed09	-0.000718875	-0.00970608	0.000536769
Delayed10	-0.00742441	-0.0197459	-0.0115928
Delayed11	-0.0165988	0.0193472	-0.014111
Delayed12	0.00115567	0.00974976	0.0279995
Delayed13	0.00574616	-0.00453794	-0.0106338
Delayed14	0.00152823	0.0187542	0.0344457
Delayed15	0.024899	0.0274982	0.0190864
Delayed16	0.00106169	-0.00391882	0.0109207
Delayed17	0.0097203	0.00353568	-8.51064e-05
Delayed18	0.0156924	0.047152	0.0116611
Delayed19	0.0127588	0.000344524	-0.00766745
Delayed20	0.0263565	0.033969	0.0673154
Delayed21	0.0123746	0.0475455	0.0094803
Delayed22	0.0373734	-0.00562597	0.00533157
Delayed23	0.00531473	0.00531696	-0.0165912
