# Supplementary material for: Early language exposure affects neural mechanisms of semantic representations
Source: eLife. 2023 May 10;12:e81681. doi: 10.7554/eLife.81681 (PMC10238089; doi:10.7554/eLife.81681)
Supplement: Figure 3—source data 1. [file elife-81681-fig3-data1.xlsx]

## Sheet: Sheet1
sub_id	category behavioral RDM	continuous behavioral RDM
Native01	0.0211196	0.0601167
Native02	0.0165683	0.0243178
Native03	0.011807	0.000239694
Native04	0.0492412	0.0141843
Native05	0.0461551	-0.00688143
Native06	0.0456746	0.0543012
Native07	-0.0291798	-0.0200271
Native08	0.0260571	0.0525547
Native09	0.0608675	0.0543731
Native10	0.0598761	0.0209902
Native11	-0.0105657	0.0111166
Native12	0.0340808	-0.0177379
Native13	0.0589458	0.0167085
Native14	0.027731	0.0185025
Native15	-0.0138618	0.0054508
Native16	0.0397783	0.0646421
Delayed01	0.00482075	0.00907005
Delayed02	-0.0510195	-0.0188151
Delayed03	-0.0125749	-0.000791609
Delayed04	-0.0174432	-0.0182052
Delayed05	0.0205669	0.00765457
Delayed06	0.0144281	0.00185904
Delayed07	-0.0191804	-0.0520556
Delayed08	-0.00225006	-0.0113769
Delayed09	-0.0233392	0.0226329
Delayed10	-0.0190671	-0.0145104
Delayed11	-0.0329555	-0.0368873
Delayed12	-0.008169	0.0209242
Delayed13	0.00881457	-0.0080304
Delayed14	-0.0227938	-0.0640585
Delayed15	0.0410229	0.110207
Delayed16	-0.00350905	0.0283475
Delayed17	0.0254722	0.00542363
Delayed18	0.0418	-0.00623885
Delayed19	0.0181057	-0.0370326
Delayed20	0.0449077	0.068721
Delayed21	0.0326385	0.000584063
Delayed22	0.00278845	-0.0594027
Delayed23	-0.0167552	-0.0607122
