# Supplementary material for: Early language exposure affects neural mechanisms of semantic representations
Source: eLife. 2023 May 10;12:e81681. doi: 10.7554/eLife.81681 (PMC10238089; doi:10.7554/eLife.81681)
Supplement: Figure 4—source data 1. [file elife-81681-fig4-data1.xlsx]

## Sheet: Sheet1
sub_id	ATL	pMTG	AG	IFGorb	IFG	MFG
Native01	0.0114783	0.0186371	-0.000485216	0.0170457	0.0232177	-0.00781097
Native02	0.0283857	0.0322446	0.0375095	0.0117168	0.0132245	0.0306847
Native03	0.00901236	0.00486135	-0.00575872	0.0124176	0.0109314	0.00947091
Native04	0.0393248	0.0363004	0.0111547	0.0264969	0.0183723	0.00609263
Native05	0.0153961	0.00969241	0.0118352	0.00397154	0.0269313	0.0183232
Native06	0.0165879	0.01236	0.0145871	0.0213273	0.00264593	0.00742494
Native07	0.0144199	0.0297004	0.0442861	0.0136128	0.0277252	0.0292593
Native08	0.0397709	0.0213874	0.0121174	-0.000806066	-0.00231433	0.00356543
Native09	0.01113	0.0249985	0.00845965	0.00311333	-0.00294696	0.0139969
Native10	0.0255175	0.0176266	0.0123306	-0.00838074	0.017415	-0.000999969
Native11	0.0195502	0.00934201	0.0170982	0.0276467	0.00963332	0.0138937
Native12	0.0113305	0.00211351	-0.000381112	0.00492044	0.0395205	0.00753573
Native13	0.0121948	0.0189519	0.0359733	0.0170016	-0.0021982	-0.00798004
Native14	0.0279547	0.026748	0.014392	0.0355997	0.0189302	0.0103472
Native15	0.00166009	0.00463638	0.00438114	0.00124894	0.00599071	0.0106007
Native16	0.00371855	0.00859343	0.0215819	0.00436463	0.0153585	0.011997
Delayed01	-0.00460984	0.0119949	0.0145592	0.000732983	0.0223359	0.014198
Delayed02	-0.0143885	0.0416869	0.00887212	-0.0206463	0.0198465	0.0194477
Delayed03	0.0190179	0.0503162	-0.00167533	0.0286612	0.00810714	0.041081
Delayed04	-0.00573485	-0.0178174	-0.019235	-0.0109859	-0.0340991	-0.00592831
Delayed05	0.0190024	0.00365943	0.00796669	0.012879	0.0266208	-0.0134337
Delayed06	0.017106	0.00788592	0.00998444	-0.0170112	-0.00948254	0.00666537
Delayed07	-0.0046439	0.0102112	0.0196594	0.00676593	-0.00678865	0.0394658
Delayed08	-0.0103997	-0.022405	-0.0129628	-0.00807185	-0.00544138	-0.00609133
Delayed09	-0.00684643	-0.0161622	-0.00412865	-0.0016572	-0.00992302	-0.00198151
Delayed10	-0.00403579	-0.00554349	0.00417337	-0.0172131	-0.00141494	0.0171794
Delayed11	0.00228654	0.00785958	0.0144917	-0.00787968	-0.0113272	-0.00444705
Delayed12	-0.0024693	0.0107362	0.026195	0.00469823	0.0434499	0.0374305
Delayed13	0.00406047	-0.00262061	-0.0117445	-0.0157	0.00344857	0.0166275
Delayed14	0.0198688	0.0138073	-0.00068899	0.0318084	0.0105391	-0.00550772
Delayed15	-0.00523655	0.0217047	0.00666925	0.00896585	0.0271254	-0.0135884
Delayed16	-0.00568859	0.00618089	0.0257172	0.0166915	0.0102849	-0.0166277
Delayed17	0.0137749	5.44421e-05	0.0147743	0.00444968	0.0106399	0.0216006
Delayed18	0.018612	0.0456282	0.0369337	0.0102881	0.011578	0.0292905
Delayed19	0.00896936	0.00169981	-0.00196517	-0.0101591	-0.015191	0.00777077
Delayed20	0.00586422	0.0135823	0.0297125	0.0524856	0.0244011	-0.00831921
Delayed21	0.0232953	0.0304139	0.0165341	0.00796073	0.0182435	-0.00946771
Delayed22	0.0136591	0.00881653	0.0095292	0.00786449	0.0196125	-0.014847
Delayed23	-0.00817463	-0.00735951	-0.00193162	-0.0199463	0.00151665	0.0228718
