# Supplementary material for: Early language exposure affects neural mechanisms of semantic representations
Source: eLife. 2023 May 10;12:e81681. doi: 10.7554/eLife.81681 (PMC10238089; doi:10.7554/eLife.81681)
Supplement: Figure 5—source data 1. [file elife-81681-fig5-data1.xlsx]

## Sheet: Figure3
	Group-level ROIs						individual fROIs
	dATL		pMTG		IFG		dATL		pMTG		IFG
sub_id	nonobject_words	object_words	nonobject_words	object_words	nonobject_words	object_words	nonobject_words	object_words	nonobject_words	object_words	nonobject_words	object_words
Native01	-0.358019	-0.474821	0.222484	-0.612745	-0.249752	-0.39352	1.93209	-2.51883	1.16498	-5.93743	-0.694323	-3.16211
Native02	0.715053	0.350009	0.451175	0.570657	0.127857	0.369264	4.08076	1.22483	6.66128	4.21868	3.86501	0.628452
Native03	0.437241	0.0267917	0.365831	0.167446	1.25797	0.0570224	2.16363	-0.330962	1.70922	-0.412747	7.72469	4.81212
Native04	0.245376	-0.190372	1.2051	1.2418	0.328728	-0.17531	1.58381	-1.51995	9.03807	6.35052	1.70915	-3.04662
Native05	0.271465	-0.215379	-0.44445	-0.11429	-0.396499	-0.190129	1.71285	-0.793952	-2.44685	-0.903214	-3.18966	-5.28791
Native06	-0.516074	-0.475346	0.618194	0.0739808	0.521652	-0.37058	-1.67088	-2.12812	5.72305	-0.303129	3.66543	0.423244
Native07	-0.412112	-0.359263	0.7632	0.159819	0.721412	-0.284365	4.84938	0.105948	20.9917	9.60391	5.34738	0.704124
Native08	0.12035	0.324026	0.263523	0.233694	0.229242	0.348483	1.91502	0.609247	0.0297799	0.491416	0.890923	2.44986
Native09	0.490189	0.185218	0.672942	-0.0268146	0.771132	0.193044	2.72369	0.62374	2.35782	-0.570729	3.67107	2.14159
Native10	0.442636	-0.0344783	0.358242	0.0181505	0.671017	-0.034186	1.53817	-0.564453	-0.179935	-2.18991	1.45475	-0.357834
Native11	0.235204	-0.273466	1.13046	0.496043	0.963293	-0.256013	1.30233	-1.59092	7.44788	2.40955	5.02781	1.10782
Native12	0.375242	0.13435	0.601952	0.297185	0.852903	0.175956	2.08116	1.54424	5.51579	4.34403	5.49264	3.29414
Native13	0.319552	-0.121001	-0.105929	-0.0906359	0.410767	-0.0817739	2.93158	-0.94883	0.900274	0.132835	0.902433	0.50851
Native14	0.307899	0.17722	0.958507	0.555007	0.47155	0.178968	1.47723	0.882435	6.8646	2.66986	2.87901	0.433382
Native15	1.8136	1.03787	1.93917	0.980604	1.37999	0.890312	10.2866	5.87106	10.851	3.48893	8.68129	2.26428
Native16	-0.163548	-0.285147	1.24996	0.428714	0.0908442	-0.275455	1.71712	0.487636	12.453	5.29954	4.50593	-1.82228
Delayed01	0.232422	0.236096	-0.289953	-0.328509	0.0100014	0.0752257	1.73372	0.996666	-0.668944	-1.91336	-0.473451	1.19425
Delayed02	0.180068	0.293299	0.677362	0.273624	0.654761	0.162603	1.38026	1.30742	5.7946	1.14459	4.4861	0.321992
Delayed03	0.225783	0.139989	0.219778	0.086494	0.628986	0.115741	2.63362	0.215376	3.12577	-1.76185	4.44736	-0.277154
Delayed04	0.0681314	-0.27112	-0.17245	-0.810159	-0.45228	-0.966546	-0.37997	1.35271	-1.49696	-4.15188	-1.89503	-3.89825
Delayed05	0.0179942	-0.158977	1.2249	0.725729	0.732419	0.358163	-0.0540925	-0.715755	13.1304	7.84129	6.12452	0.969907
Delayed06	-0.0999746	0.0207848	-0.216477	-0.242414	-0.346508	-0.309893	-1.87852	-0.463382	-3.4586	-2.0431	-4.5314	-3.48975
Delayed07	0.0374946	-0.284354	0.965802	0.326044	0.67787	-0.341341	1.79535	0.896812	8.29775	-1.16044	5.43553	0.358017
Delayed08	0.348084	0.394261	0.468745	0.443159	0.422964	0.377858	0.829547	0.920638	3.58958	3.12961	0.776757	2.79222
Delayed09	0.102629	-0.0861481	0.32649	0.500795	-0.529545	0.337071	1.59743	-0.701754	3.85902	2.44106	0.60964	0.416206
Delayed10	0.0385026	-0.256271	0.0588406	0.000883765	-0.255464	0.00460623	0.698483	-1.30103	-0.203094	-0.236273	-1.87457	-0.442178
Delayed11	-0.545622	-0.501136	0.6874	0.20192	0.492338	0.302802	-2.76216	-3.06406	2.22111	-1.22633	2.71334	1.31396
Delayed12	0.596218	0.638765	1.01589	1.30909	0.734694	0.346665	1.11715	1.7145	3.73665	4.3954	4.38067	2.04599
Delayed13	-0.141076	-0.112082	0.373697	0.317296	-0.0260909	-0.0960024	3.10494	2.35077	0.995221	0.00133213	0.325997	-0.591421
Delayed14	-0.0431152	0.329384	1.11953	0.900999	0.654553	0.417989	0.19674	1.15375	6.63522	3.86686	7.0337	0.320321
Delayed15	-0.420018	-0.361553	0.137045	0.550899	0.0018049	-0.0893876	-1.41095	-1.28666	0.613205	-0.529521	0.953488	-0.928257
Delayed16	0.260058	-0.160555	-0.223478	-0.811881	0.130908	-0.0952644	2.01667	-1.02514	0.388683	-3.85398	-0.224429	-0.35601
Delayed17	-0.106508	-0.53744	-0.221092	-0.473125	-0.00216855	-0.704174	-1.00476	-5.46967	-1.41475	-3.41712	0.208964	-5.8061
Delayed18	-0.00859183	0.27519	1.74053	1.91404	-0.232999	-0.190883	2.71056	4.08536	10.5077	8.7828	3.54536	2.45686
Delayed19	-0.301564	-0.353821	0.0365368	-0.257279	0.809819	0.485615	-2.31781	-1.57423	4.86723	-0.220178	4.95117	2.5182
Delayed20	0.216206	-0.226256	1.11118	0.194712	0.743392	-0.611994	2.17886	-1.72276	10.5226	2.05129	7.77331	-4.89466
Delayed21	0.390473	0.116606	0.677837	-0.532671	0.203395	-0.524199	2.4779	1.51757	8.46186	-6.06289	0.436423	-3.09334
Delayed22	0.377172	-0.0489612	-0.0136681	0.194096	-0.00172694	-0.142059	6.35349	0.0319026	-0.665227	0.718987	1.57967	-1.03735
Delayed23	0.114782	-0.00875773	1.0588	0.94225	0.506518	0.190189	1.16301	-0.423735	5.49339	5.02587	1.11328	-0.199214
