# Supplementary material for: Early language exposure affects neural mechanisms of semantic representations
Source: eLife. 2023 May 10;12:e81681. doi: 10.7554/eLife.81681 (PMC10238089; doi:10.7554/eLife.81681)
Supplement: Table 1—source data 1. [file elife-81681-table1-data1.xlsx]

## Sheet: Table1
sub_id	age of acquisition of CSL	self-rated parental CSL proficiency (1-7 scale)	McArthur Scale of Subjective Social Status, childhood (1-10 scale)	years of education-father	years of education-mother	self-reported CSL comphrension (1-7 scale)	self-rated CSL production (1-7 scale)	lipreading of acquaintances (1-7 scale)	lipreading-strangers (1-7 scale)	Adult Reading History Questionnaire (1-5 scale)	self-rated reading speed (1-5 scale)	self-rated writing skills (1-5 scale)	self-rated reading comprehension (1-5 scale)
Native01	0	7	1	7	7	6	5	3	1	2.6	1	1	2
Native02	0	7	2	12	12	6	5	4	3	2.68	5	3	3
Native03	0	7	2	6	6	4	4	1	1	2.04545	1	1	1
Native04	0	7	2	9	9	6	6	2	1	2.25	1	2	2
Native05	0	7	6	9	7	5	5	3	1	2.2	1	1	2
Native06	0	7	4	7	6	7	7	1	1	4.04167	3	4	4
Native07	0	7	10	0	3	7	7	2	2	1.68	1	1	1
Native08	0	5	3	6	0	5	5	4	2	2.04167	1	1	2
Native09	0	7	5	9	8	7	7	4	3	2.04	2	2	2
Native10	0	7	3	6	3	5	5	2	2	2.96	3	3	3
Native11	0	7	5	6	6	6	5	4	2	3	3	3	3
Native12	0	7	5	9	11	7	5	4	3	2.68	3	3	3
Native13	0	6	8	11	3	6	6	2	2	2.7619	3	3	3
Native14	0	7	4	9	8	6	6	3	2	1.55	2	2	2
Native15	0	7	1	7	7	7	7	4	3	3.38095	5	3	3
Native16	0	7	1	2	9	7	7	2	1	3.48	3	3	3
Delayed01	7	4	4	5	6	6	7	4	2	2.28571	2	3	2
Delayed02	5	1	5	12	12	4	4	3	1	3.36	4	5	4
Delayed03	8	4	1	12	9	7	7	4	1	3.08	3	3	2
Delayed04	8	1	3	15	8	7	6	3	2	3	3	3	3
Delayed05	8	4	2	9	9	7	7	4	1	2.20833	3	3	3
Delayed06	10	2	2	9	6	6	4	4	1	2.88	5	5	3
Delayed07	9	4	7	9	9	6	6	3	2	3.24	4	3	1
Delayed08	7	2	4	12	6	6	6	1	1	3.56	4	4	3
Delayed09	4	4	7	15	9	6	6	5	3	2.44	3	3	3
Delayed10	6	4	3	12	6	6	5	4	3	2.95833	3	3	3
Delayed11	7	2	6	9	12	5	5	3	3	2.04	1	2	1
Delayed12	6	4	5	12	9	5	4	4	2	3.24	3	3	3
Delayed13	5	3	7	12	9	6	5	4	4	2.24	2	2	2
Delayed14	8	2	3	5	2	7	5	1	1	4	5	4	5
Delayed15	7	2	5	9	9	7	7	4	2	2.16	1	1	1
Delayed16	5	3	6	10	10	7	7	3	1	3	3	2	2
Delayed17	5	6	8	12	15	7	7	1	1	2.12	3	3	3
Delayed18	5	2	5	12	6	7	7	4	1	2.68	3	4	2
Delayed19	9	2	3	9	9	6	6	3	2	3.2	4	4	3
Delayed20	6	2	5	9	6	5	5	4	2	2.65217	3	3	3
Delayed21	8	1	1	6	8	7	7	1	2	2.8	3	3	3
Delayed22	7	2	5	15	12	7	7	4	4	2.84	3	3	3
Delayed23	9	2	3	9	9	5	5	2	1	3.32	4	4	4
